# Supplementary material for: An air-stable organometallic polymer containing titanafluorene moieties obtained by the Sonogashira–Hagihara cross-coupling polycondensation
Source: Royal Society of Chemistry journal article supplement (doi:10.1039/d0dt03663c), 2021-01-01
Supplement: d0dt03663c1.pdf [file d0dt03663c1.pdf]

Electronic Supplementary Information

**Air Stable Organometallic Polymer Containing Titanafluorene Moieties by Sonogashira-Hagihara Cross-coupling Polycondensation**

Alvin Tanudjaja, Shinsuke Inagi, Fusao Kitamura, Toshikazu Takata, and Ikuyoshi Tomita\*

Department of Chemical Science and Engineering, School of Materials and Chemical  
Technology, Tokyo Institute of Technology, Nagatsuta-cho 4259-G1-9, Midori-ku, Yokohama  
226-8502, Japan

E-mail: [tomita@echem.titech.ac.jp](mailto:tomita@echem.titech.ac.jp)

Keywords:  $\pi$ -Conjugated polymers; Polycondensation; Sonogashira-Hagihara cross-coupling  
reactions; Organometallic polymers; Titanafluorenes

## **Table of Contents**

**1. NMR Spectra**

**2. IR Spectra**

**3. Mass Spectra**

**4. Synthetic Attempts of  $\pi$ -Extended Titanafluorene Derivatives**

**5. Crystallographic Data**

**6. SEC Profile**

**7. DFT and TD-DFT Optimized Molecular Diagrams**

## 1. NMR Spectra

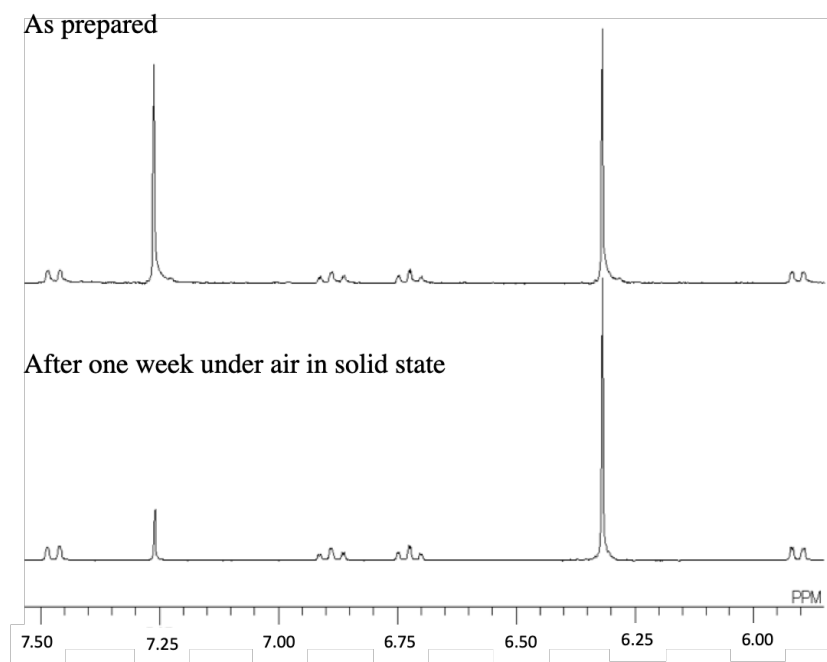

**Figure S1.**  $^1\text{H}$  NMR spectra of a titanafluorene derivative (**2**) before and after kept under air at ambient temperature for 1 week.

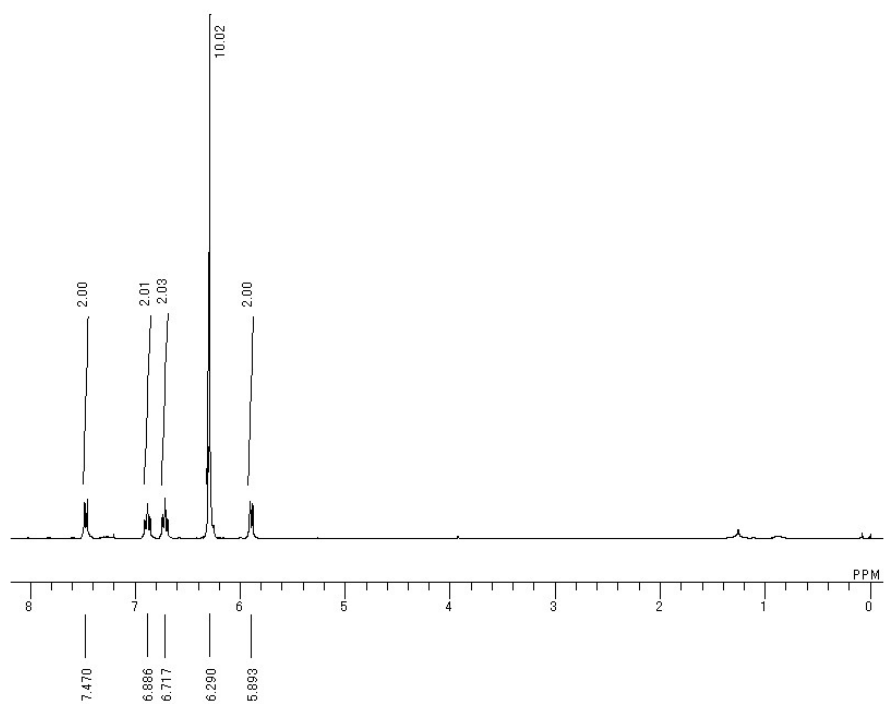

**Figure S2.**  $^1\text{H}$  NMR spectrum of **2**.

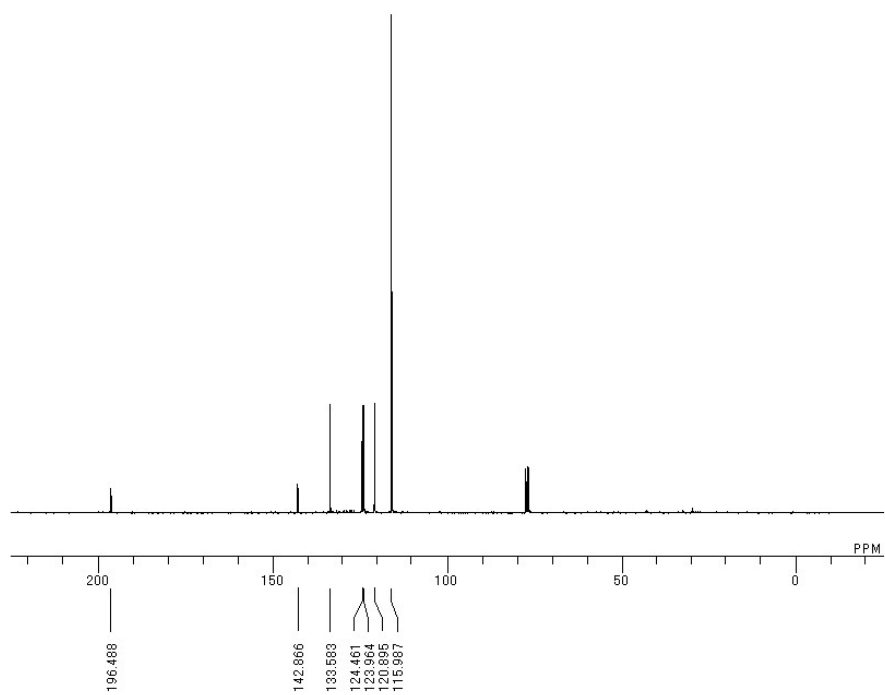

**Figure S3.**  $^{13}\text{C}\{^1\text{H}\}$  NMR spectrum of 2.

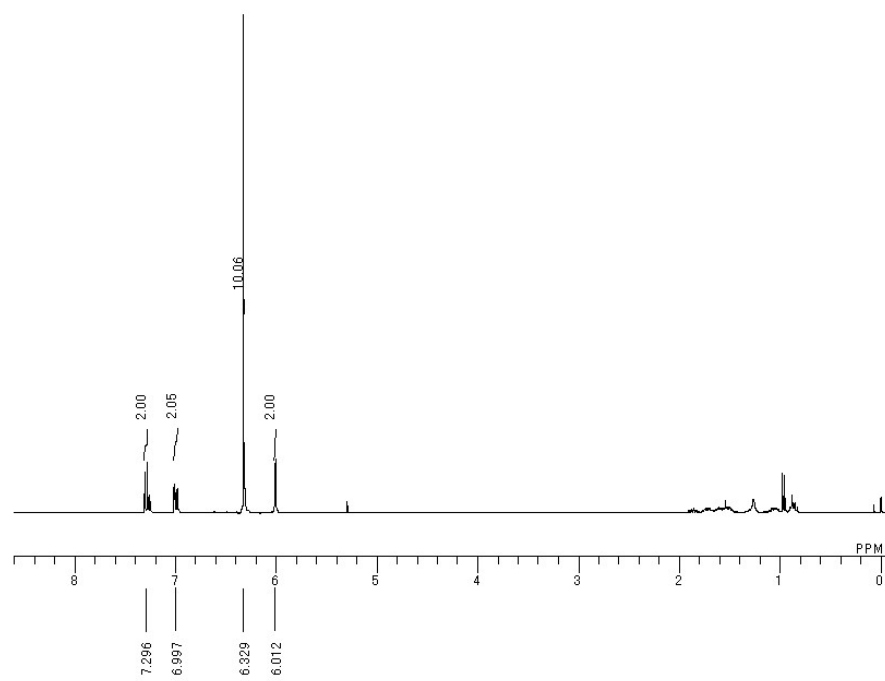

**Figure S4.**  $^1\text{H}$  NMR spectrum of 4.

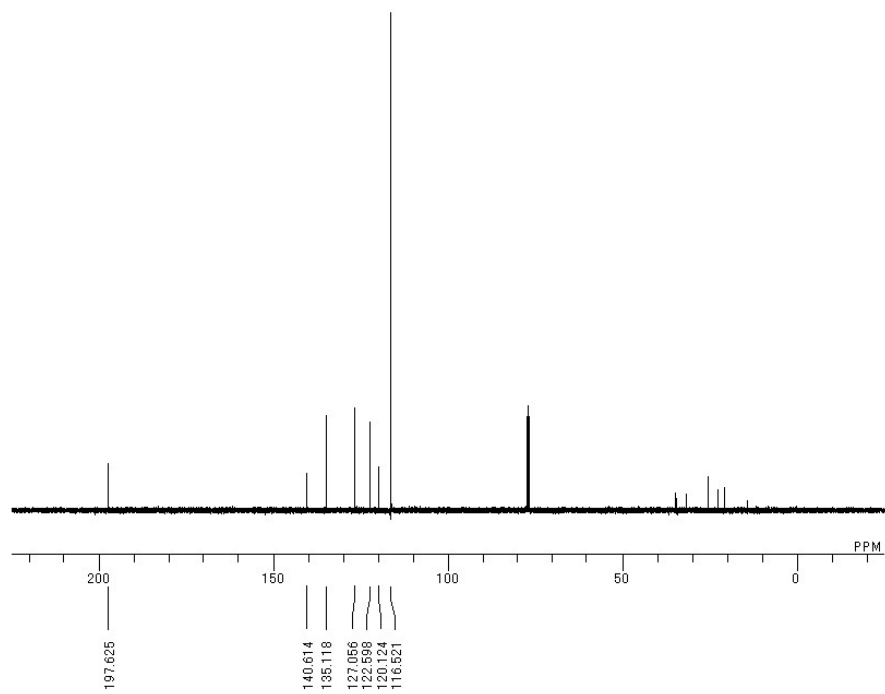

**Figure S5.**  $^{13}\text{C}\{^1\text{H}\}$  NMR of spectrum of **4**.

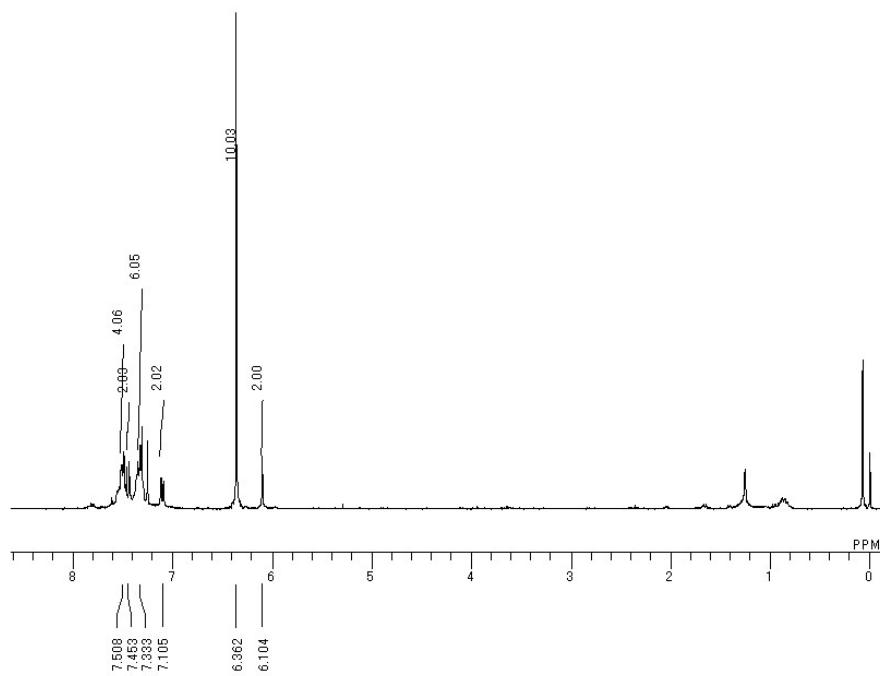

**Figure S6.**  $^1\text{H}$  NMR of spectrum of **6**.

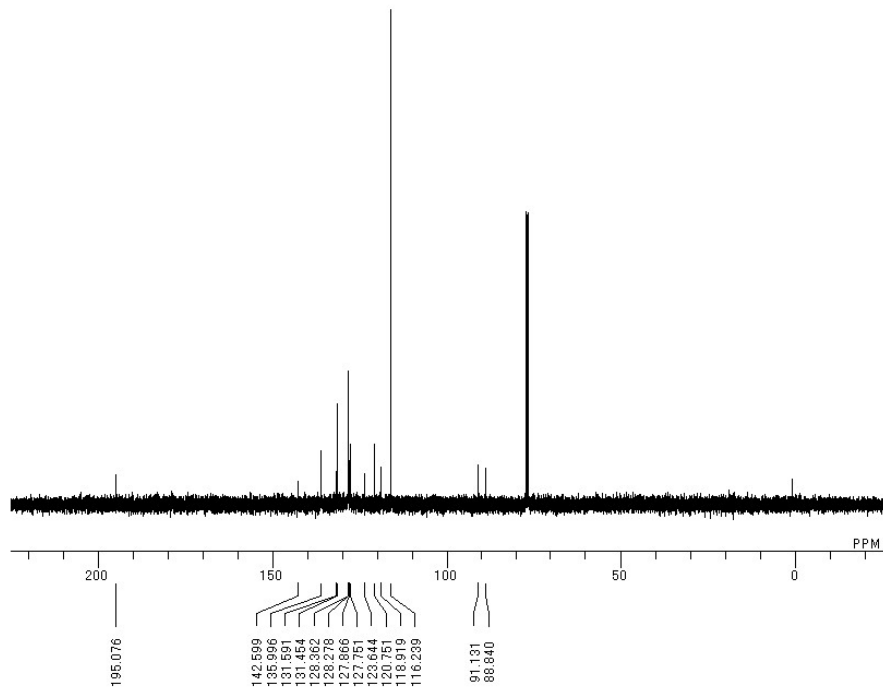

**Figure S7.**  $^{13}\text{C}\{^1\text{H}\}$  NMR spectrum of **6**.

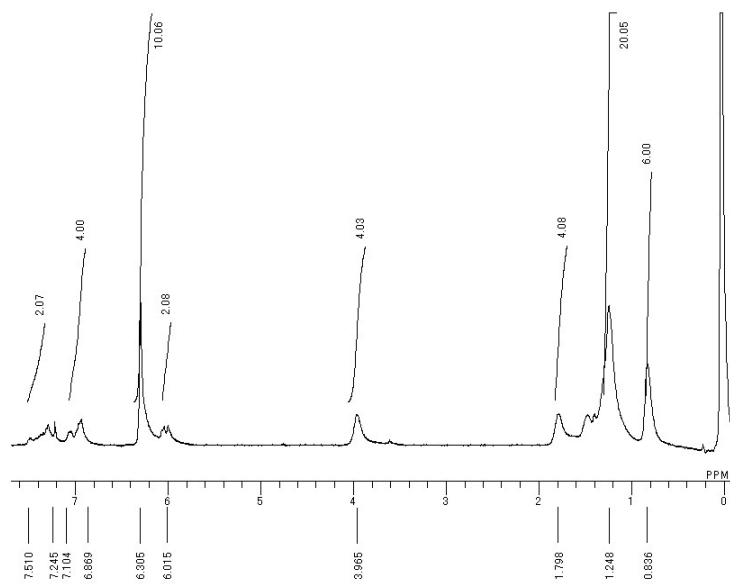

**Figure S8.**  $^1\text{H}$  NMR spectrum of **8**.

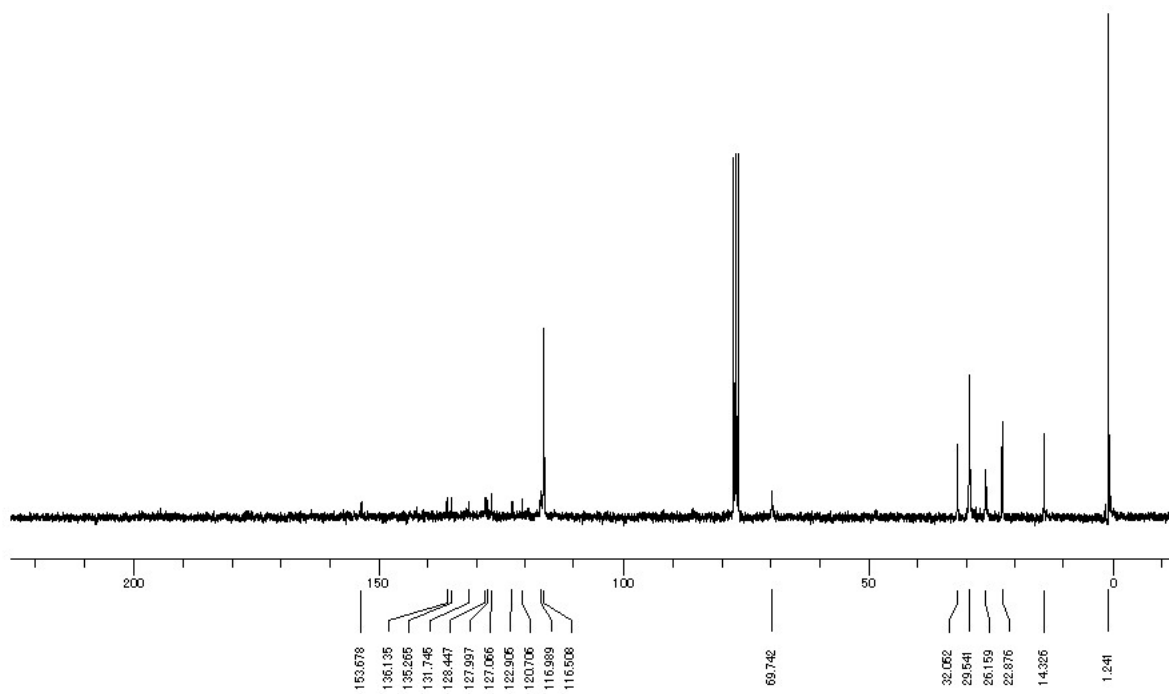

**Figure S9.**  $^{13}\text{C}\{^1\text{H}\}$  NMR spectrum of **8**.

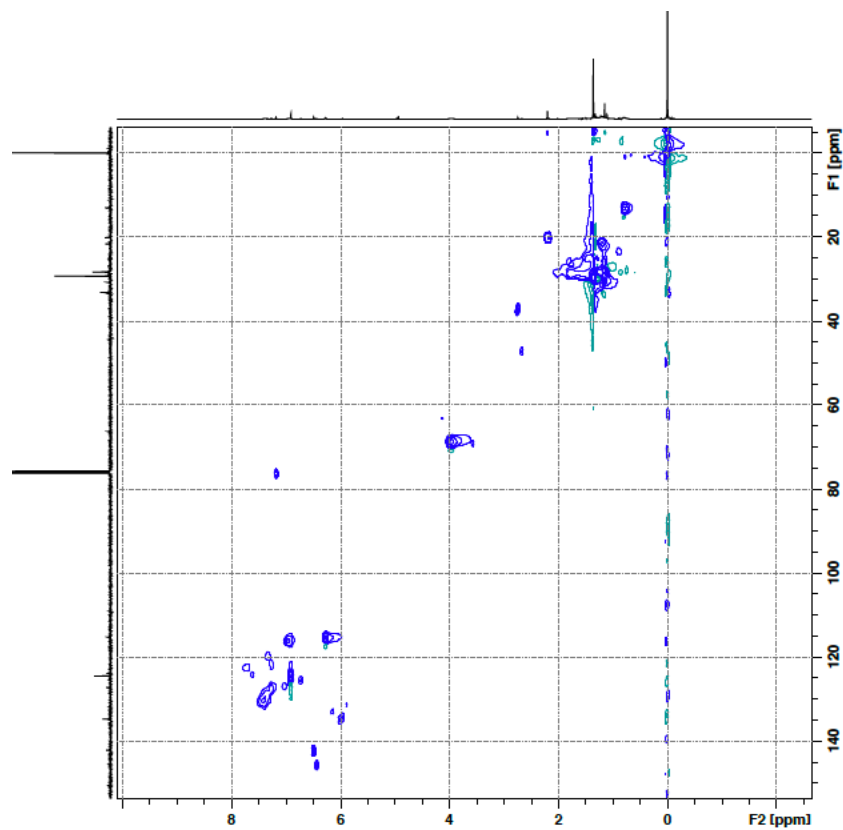

Figure S10. 2D  $^1\text{H}$ - $^{13}\text{C}$  correlation NMR spectrum of **8**.

## 2. IR Spectra

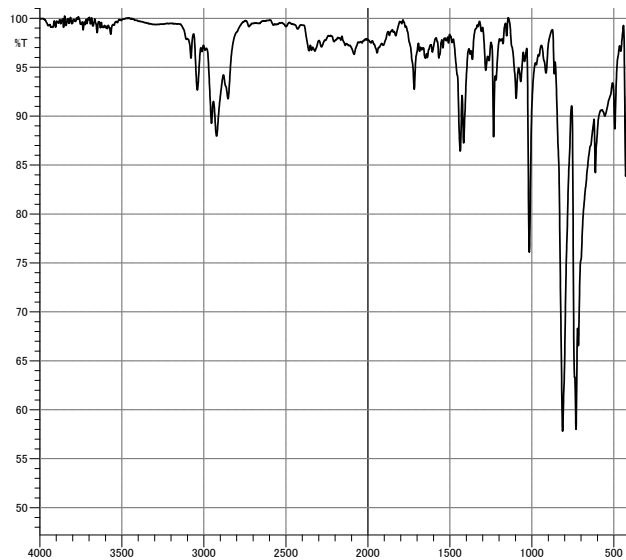

Figure S11. IR spectrum of **2**.



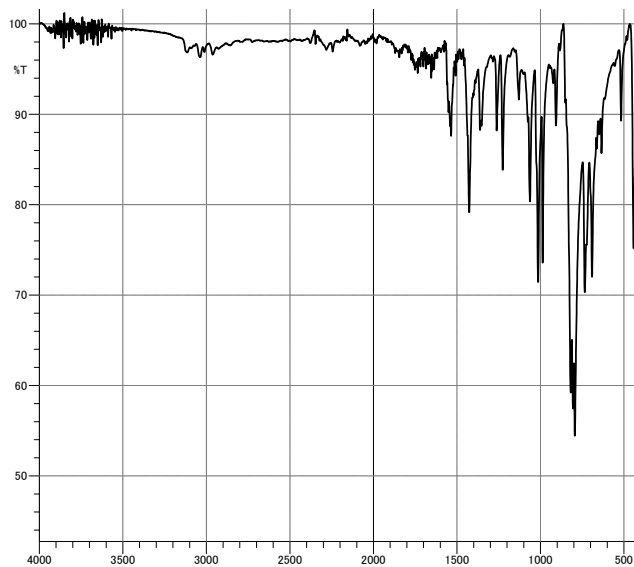

**Figure S12.** IR spectrum of **4**.

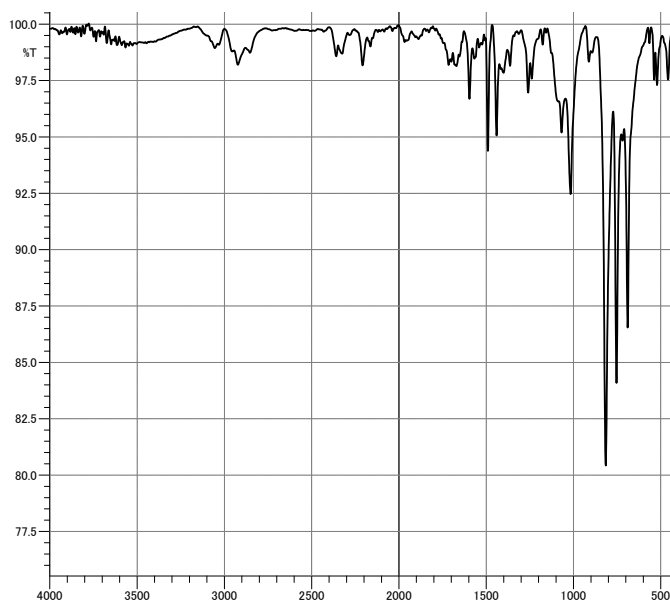

**Figure S13.** IR spectrum of **6**.

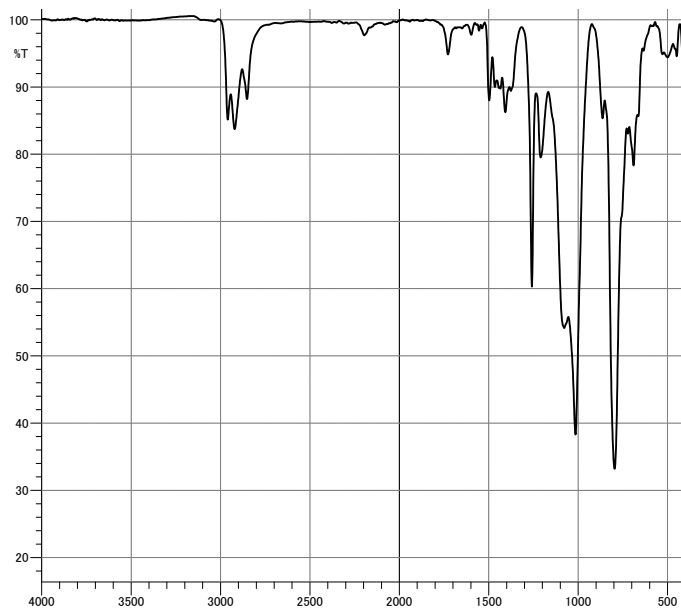

**Figure S14.** IR spectrum of **8**.

### 3. Mass Spectra

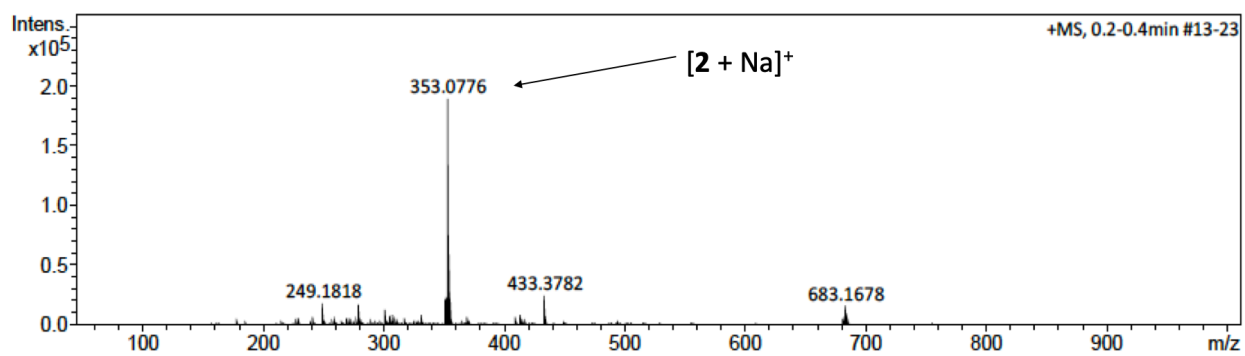

**Figure S15.** ESI-TOF mass spectrum of **2**

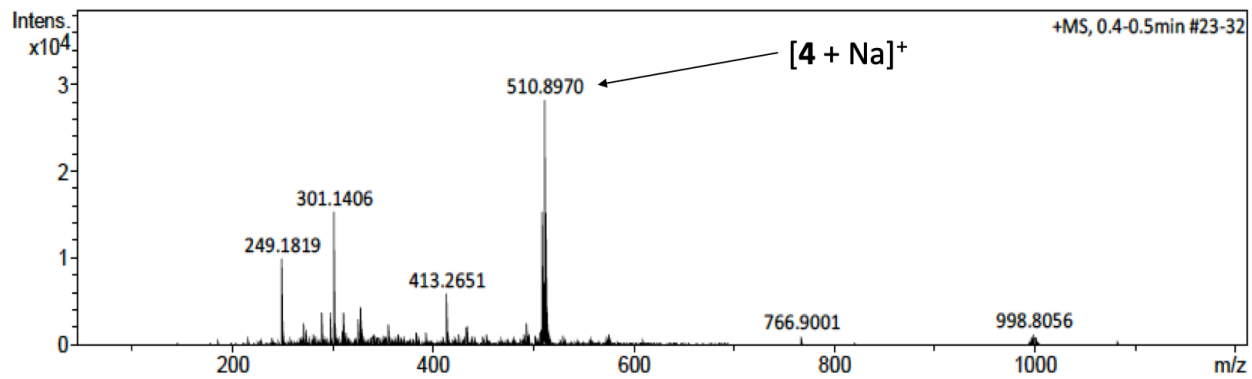

Figure S16. ESI-TOF mass spectrum of 4

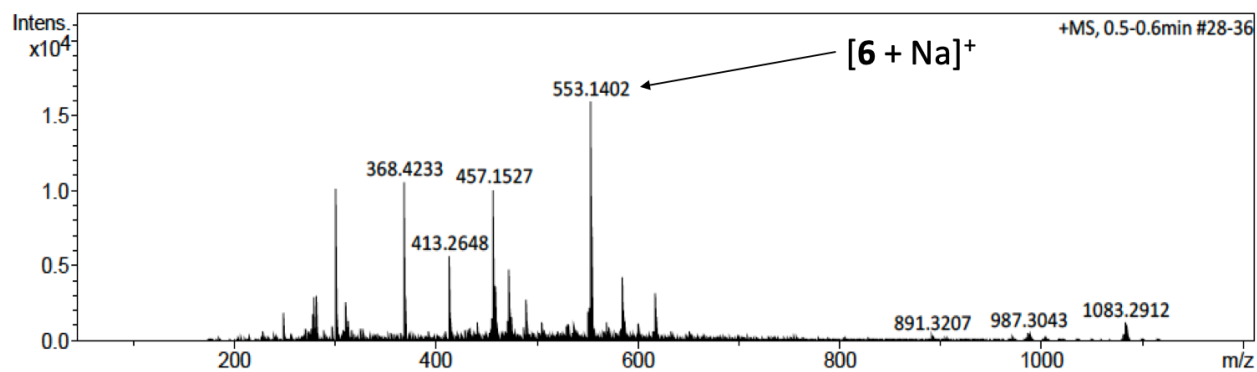

Figure S17. ESI-TOF mass spectrum of 6

### 3. Synthetic Attempts of $\pi$ -Extended Titanafluorene Derivatives

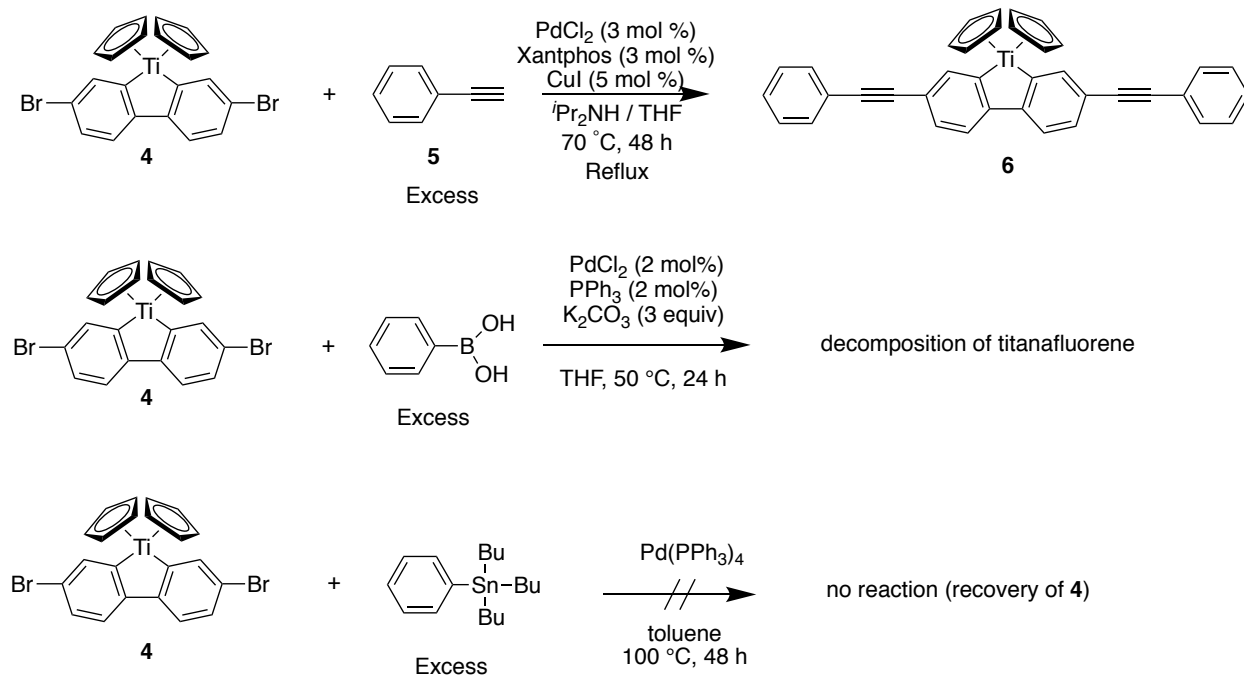

**Scheme S1.** Coupling reactions of arylene dihalide containing titanafluorene unit (4).

## 4. Crystallographic Data

**Table S1.** Crystallographic data of  $[\text{C}_{22}\text{H}_{16}\text{TiBr}_2]_2 \cdot \text{CH}_2\text{Cl}_2$

| Crystal data                                  | $[\text{C}_{22}\text{H}_{16}\text{TiBr}_2]_2 \cdot \text{CH}_2\text{Cl}_2$ |
|-----------------------------------------------|----------------------------------------------------------------------------|
| CCDC                                          | 2027344                                                                    |
| Empirical formula                             | $\text{C}_{45}\text{H}_{34}\text{Br}_4\text{Cl}_2\text{Ti}_2$              |
| Formula weight                                | 1061.06                                                                    |
| Crystal size/ $\text{mm}^3$                   | 0.308 x 0.106 x 0.07                                                       |
| Crystal system                                | monoclinic                                                                 |
| Space group                                   | $\text{P2}_1$                                                              |
| a, Å                                          | 9.2921 (2)                                                                 |
| b, Å                                          | 14.6419 (4)                                                                |
| c, Å                                          | 14.6728 (3)                                                                |
| $\alpha$ , deg                                | 90                                                                         |
| $\beta$ , deg                                 | 99.445 (2)                                                                 |
| $\gamma$ , deg                                | 90                                                                         |
| Volume, Å <sup>3</sup>                        | 1969.23 (8)                                                                |
| Density <sub>calcd</sub> , $\text{g cm}^{-3}$ | 1.789                                                                      |
| Z                                             | 2                                                                          |
| F(000)                                        | 1044.0                                                                     |
| Temperature, deg                              | -183.15                                                                    |
| 2 $\theta$ <sub>max</sub> , deg               | 149.374                                                                    |
| T <sub>min</sub> /T <sub>max</sub>            | 0.251/1.000                                                                |
| Absorption correction                         | Multi-scan                                                                 |
| No. of Reflection                             | 7706                                                                       |
| No. of Parameters                             | 478                                                                        |
| Goodness-of-fit on F <sup>2</sup>             | 1.059                                                                      |
| Final R indexes [ $I \geq 2\sigma(I)$ ]       | R1 = 0.0283, wR2 = 0.0734                                                  |
| Final R indexes [all data]                    | R1 = 0.0287, wR2 = 0.0737                                                  |
| Largest diff. peak/hole /                     | 1.18 and -0.64 $\text{e} \text{Å}^{-3}$                                    |

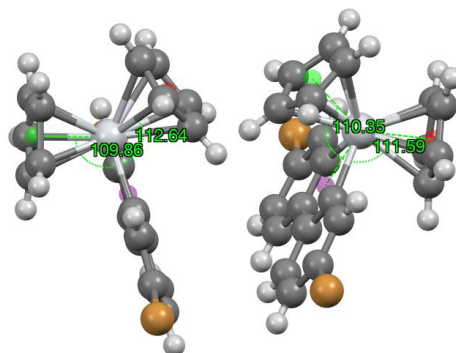

**Fig S18.** Angle of Cp(centroid) to fluorene(centroid)

## 5. Size Exclusion Chromatographic Analysis

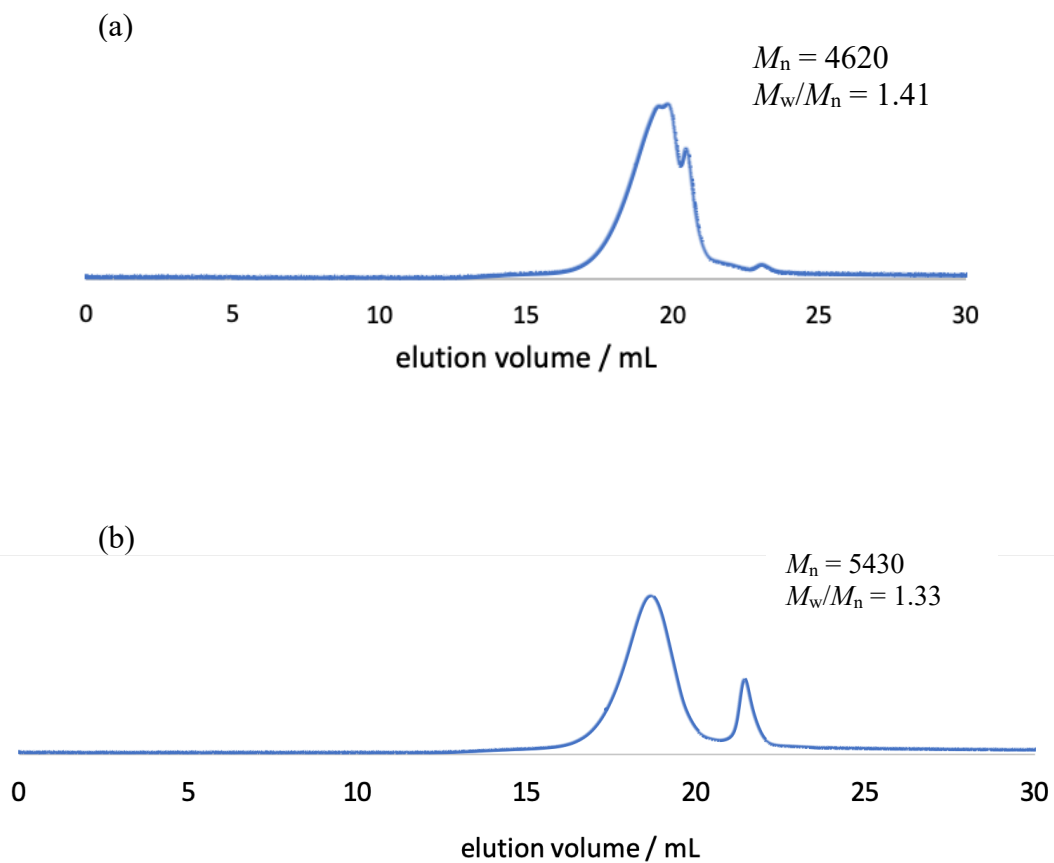

**Figure S19.** SEC profiles of **8** after isolation by precipitation into ethanol (a) and by precipitation into ethanol/ethyl acetate (v/v = 9/1).

## 6. DFT and TD-DFT Optimized Molecular Diagrams

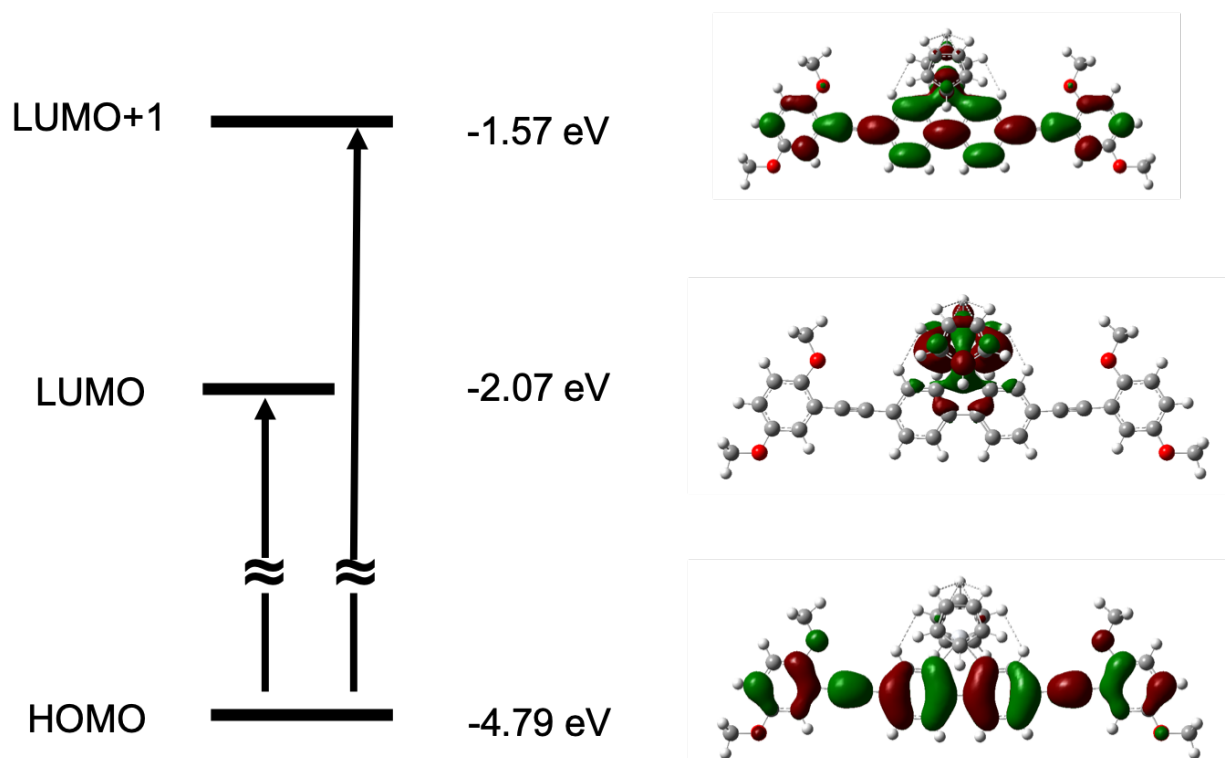

**Fig S20.** Energy profiles and molecular orbital diagrams of HOMO, LUMO, and LUMO+1 of **9**.

**Table S2.** HOMO to LUMO and HOMO to LUMO+1 transitions by TD-DFT calculations.

| Assignment                          | HOMO to LUMO | HOMO to LUMO+1 |
|-------------------------------------|--------------|----------------|
| $\lambda_{\max}$ (nm) <sup>a)</sup> | 596.86       | 416.03         |
| $f$ <sup>b)</sup>                   | 0.002        | 0.688          |
| Excitation energy (eV)              | 2.08         | 2.98           |

a) Calculated absorption maximum in the UV-vis spectrum. b) Oscillator strength.
